# Supplementary material
Source: bioRxiv or medRxiv preprint supplement (https://medrxiv.org/highwire/filestream/82366/field_highwire_adjunct_files/4/2020.05.21.20108936-5.pdf)

# Local Authority Covid-19 Deaths per 100,000 in Hospitals

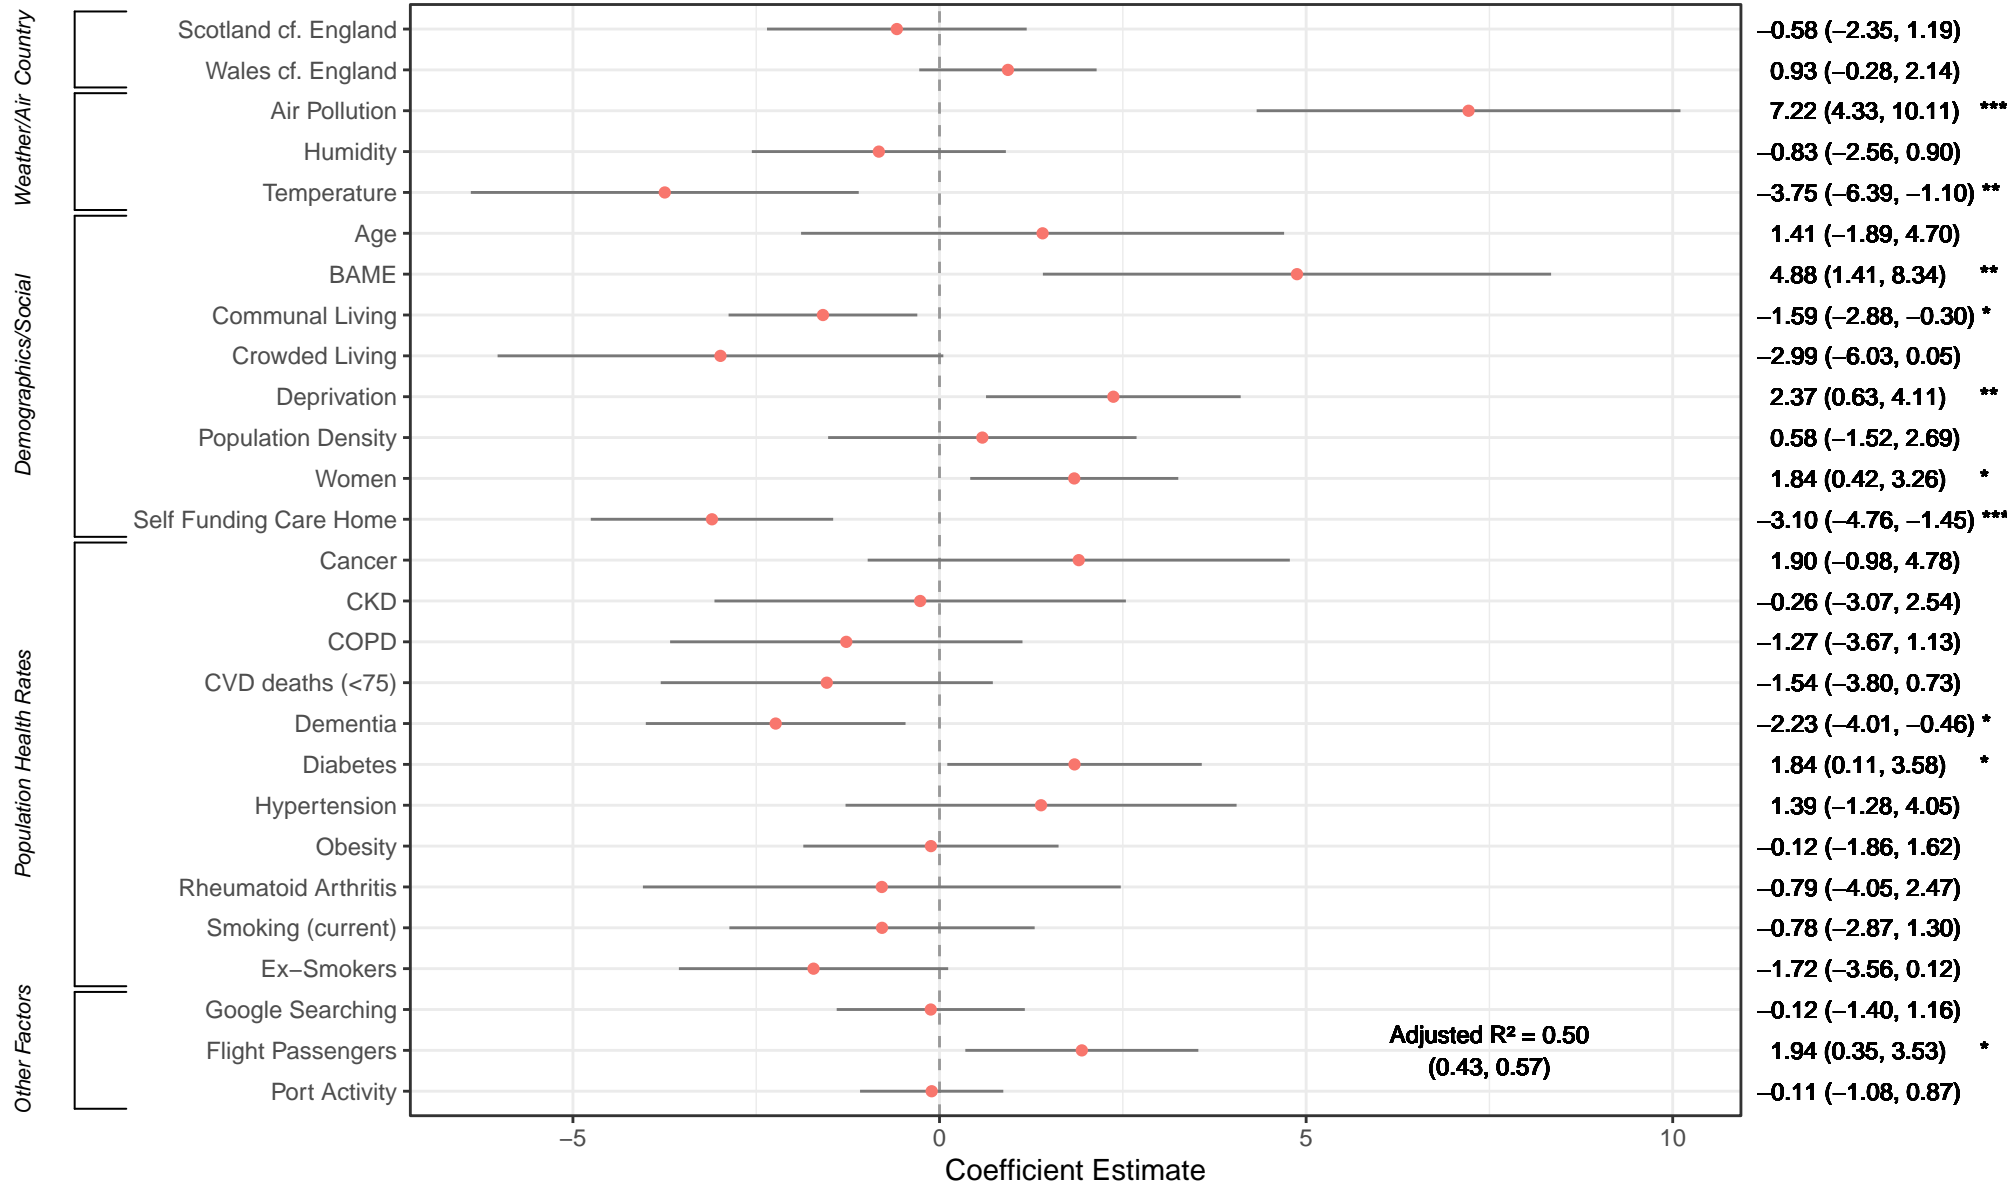

Supplement: Supplementary file [file 2020.05.21.20108936-5.pdf]
